# Supplementary material
Source: PubMed Central journal article supplement (PMC5012468)

# Supplemental Figure 4

A

Mesenteric lymph node: Living cells

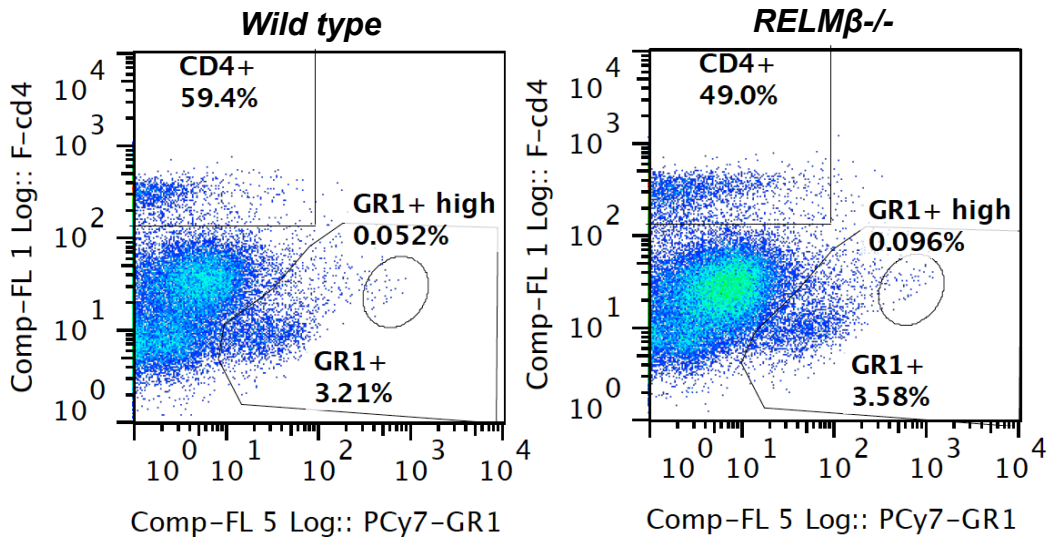

B

Mesenteric lymph node: Living IL13+ cells

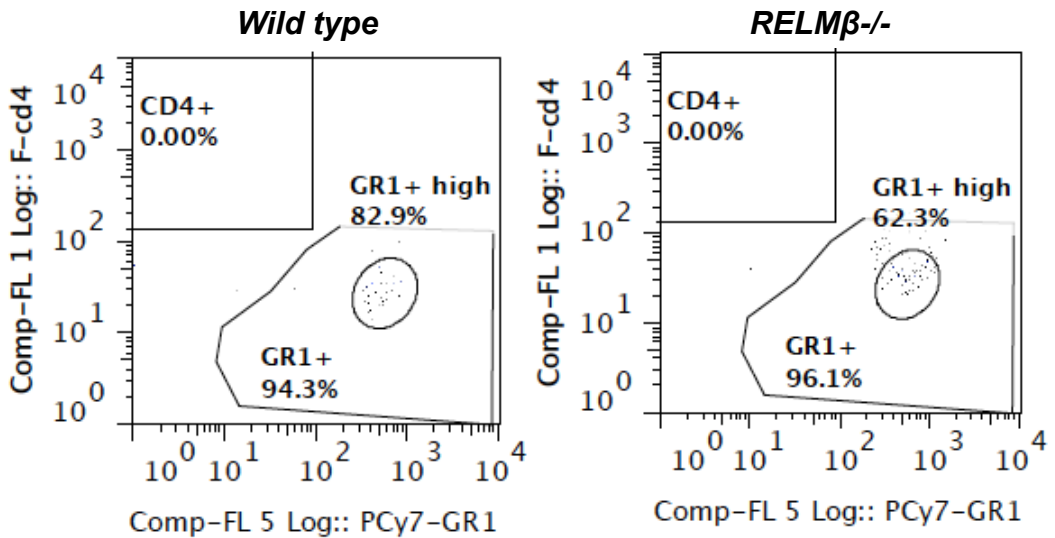

Supplement: mmc4.pdf [file mmc4.pdf]
