# Supplementary material
Source: PubMed Central journal article supplement (PMC5012468)

# Supplemental Figure 5

A

Colon tumor: Living cells

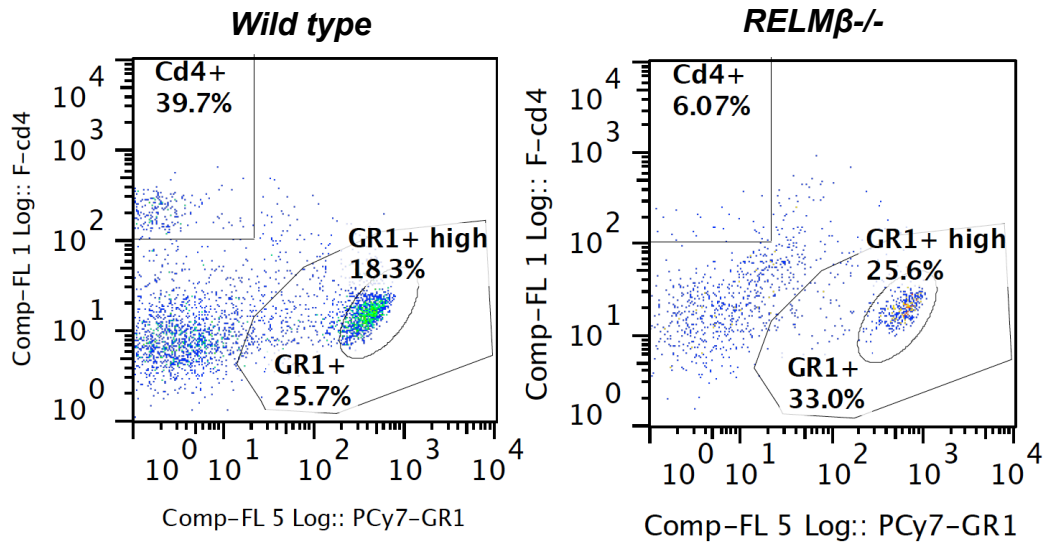

B

Colon tumor: Living IL13+ cells

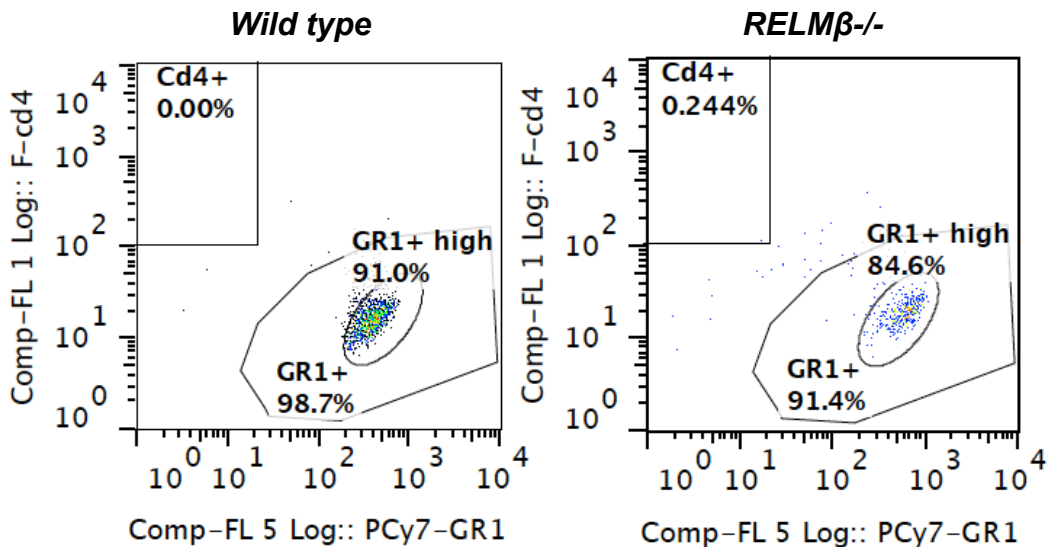

Supplement: mmc5.pdf [file mmc5.pdf]

# Supplemental Figure 7

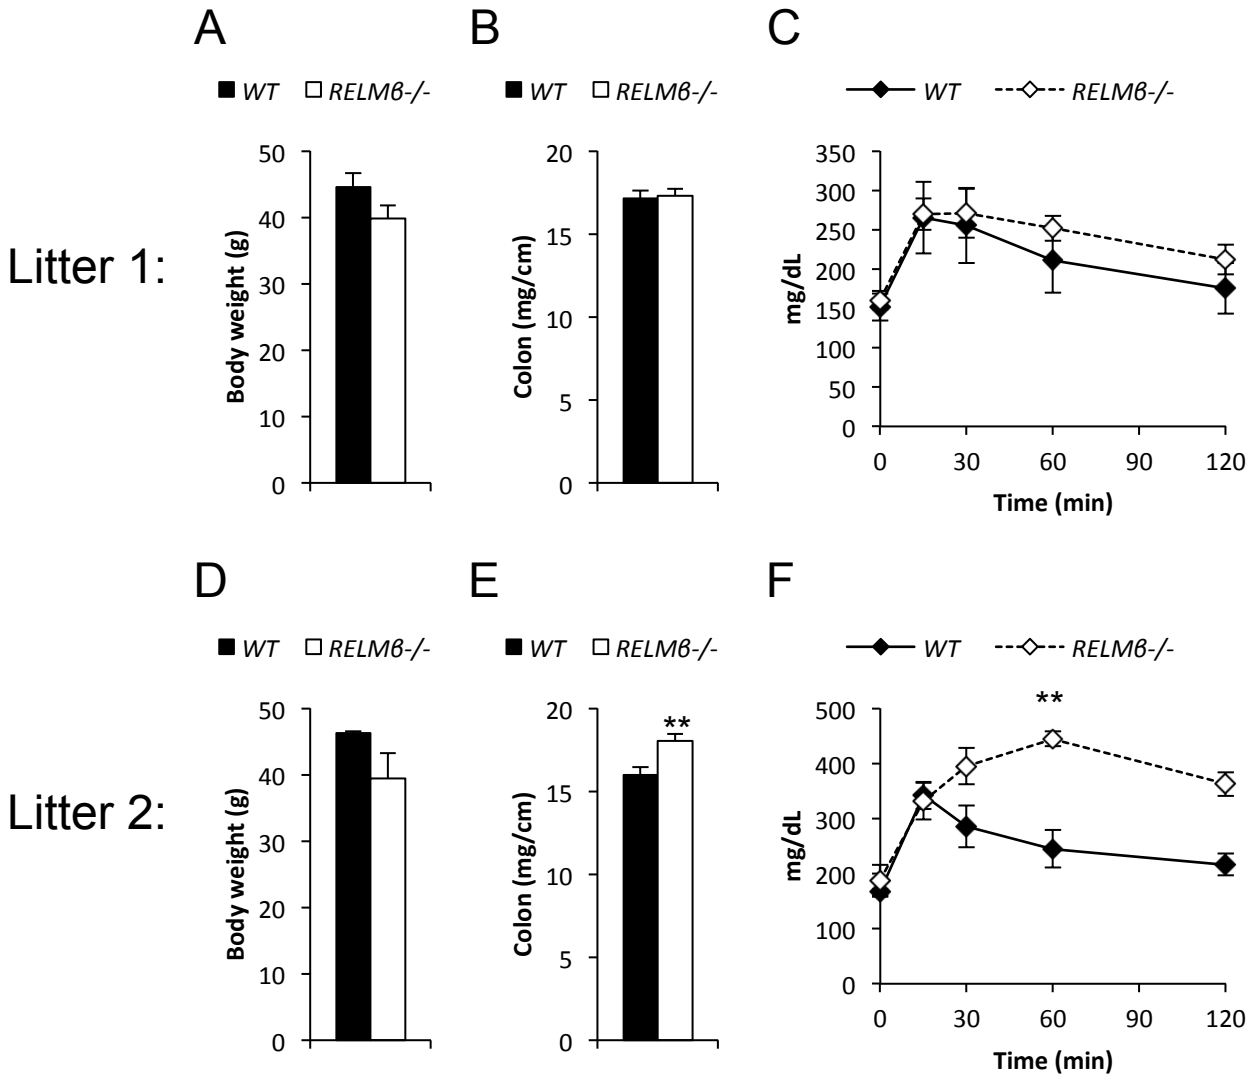

Supplement: mmc7.pdf [file mmc7.pdf]
